# Supplementary material for: B Cell Receptor Activation Predominantly Regulates AKT-mTORC1/2 Substrates Functionally Related to RNA Processing
Source: PLOS journal article supplement (doi:10.1371/journal.pone.0160255), 2016-08-03
Supplement: S1 (10.1371/journal.pone.0160255.s001) [file journal.pone.0160255.s001]

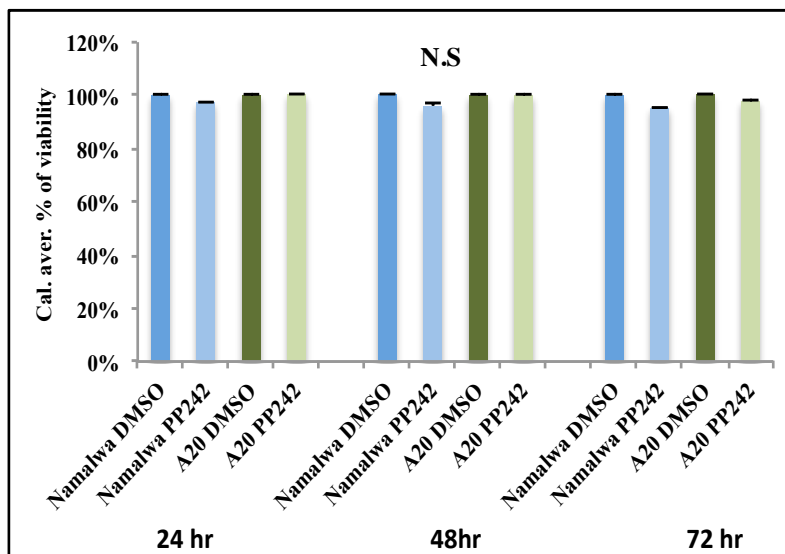

**S1 Fig.** Namalwa and A20 cells were treated with DMSO or PP242 (1 μM) and followed for 72 h. A viability test was performed. The data are presented as mean ± SEM.
